# Supplementary material for: Tracing changes in atmospheric moisture supply to the drying Southwest China
Source: Copernicus journal article supplement (doi:10.5194/acp-17-10383-2017), 2017-09-05
Supplement: Supplementary file 1 [file acp-17-10383-2017-supplement.pdf]

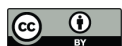

*Supplement of*

## **Tracing changes in atmospheric moisture supply to the drying Southwest China**

**Chi Zhang et al.**

*Correspondence to:* Qiuhong Tang (tangqh@igsnr.ac.cn)

The copyright of individual parts of the supplement might differ from the CC BY 3.0 License.

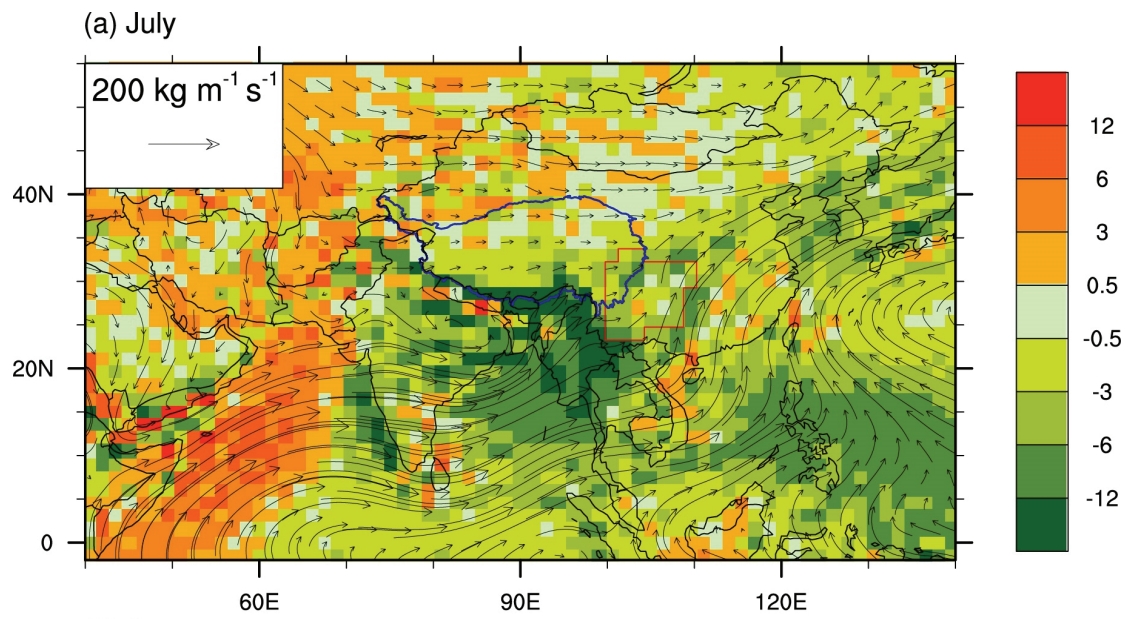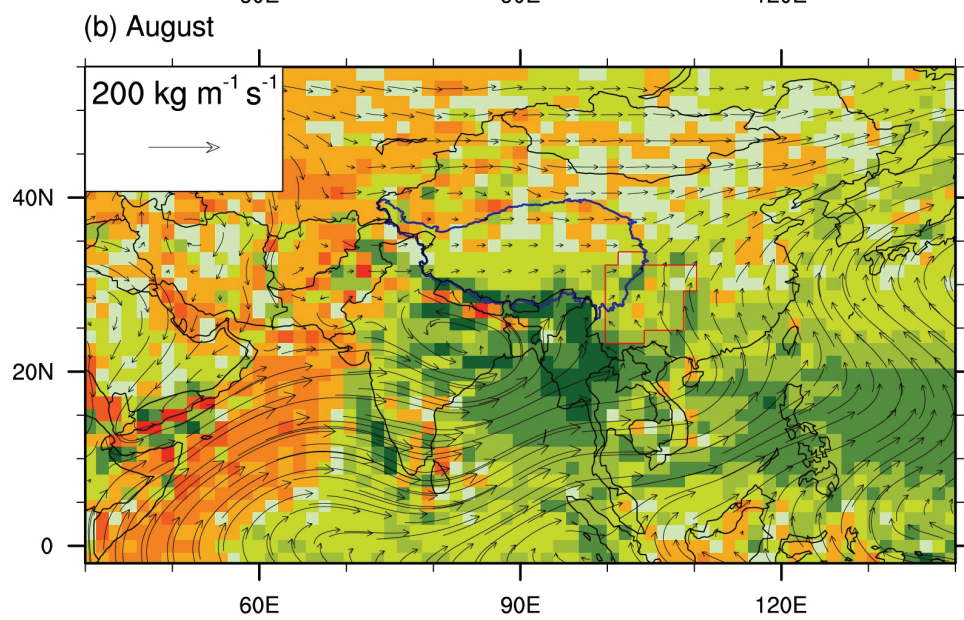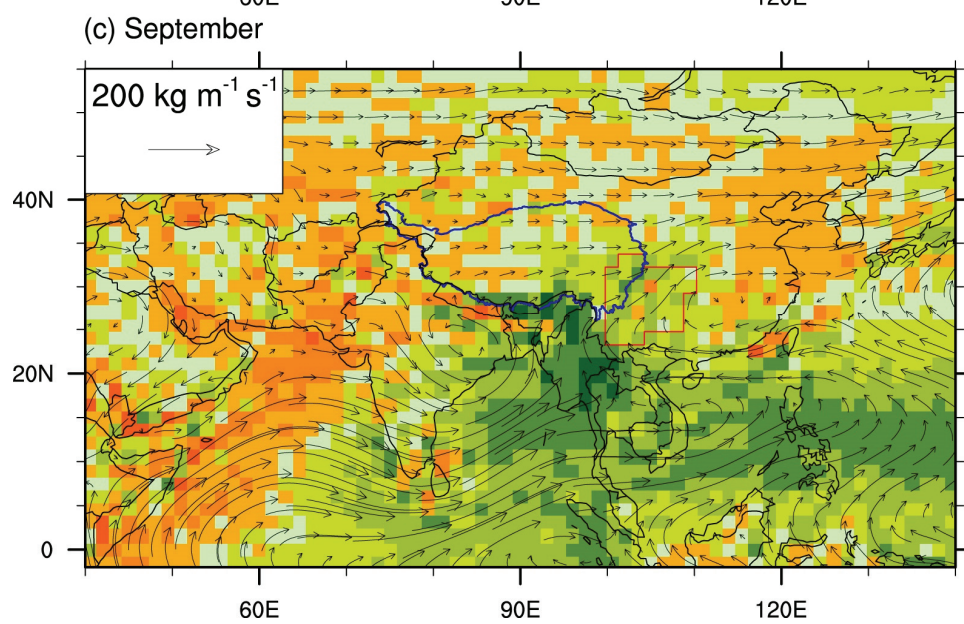

2      Figure S1. The climatological moisture transport (vectors) and its divergence (unit:  
3       $10^{-5} \text{ kg m}^{-2} \text{ s}^{-1}$ ; shading) from July to September during 1979–2013. The blue line  
4      delineates the Tibetan Plateau (Zhang et al., 2014).

7      **References**

8      Zhang, Y., Li, B., and Zheng, D.: Datasets of the boundary and area of the Tibetan Plateau, Glob.  
9      Change Res. Data Publ. Repository, <http://www.geodoi.ac.cn/weben/doi.aspx?Id=135>, 2014.

10
